# Supplementary material for: Towards an operational European Drought Impacts Database (EDID)
Source: Copernicus journal article supplement (doi:10.5194/nhess-26-845-2026), 2026-02-20
Supplement: Supplementary file 1 [file nhess-26-845-2026-supplement.pdf]

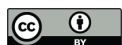

*Supplement of*

## **Towards an operational European Drought Impacts Database (EDID)**

**Kerstin Stahl et al.**

*Correspondence to:* Kerstin Stahl ([kerstin.stahl@hydrology.uni-freiburg.de](mailto:kerstin.stahl@hydrology.uni-freiburg.de))

The copyright of individual parts of the supplement might differ from the article licence.

## S1. Additional analysis of impact severity by system

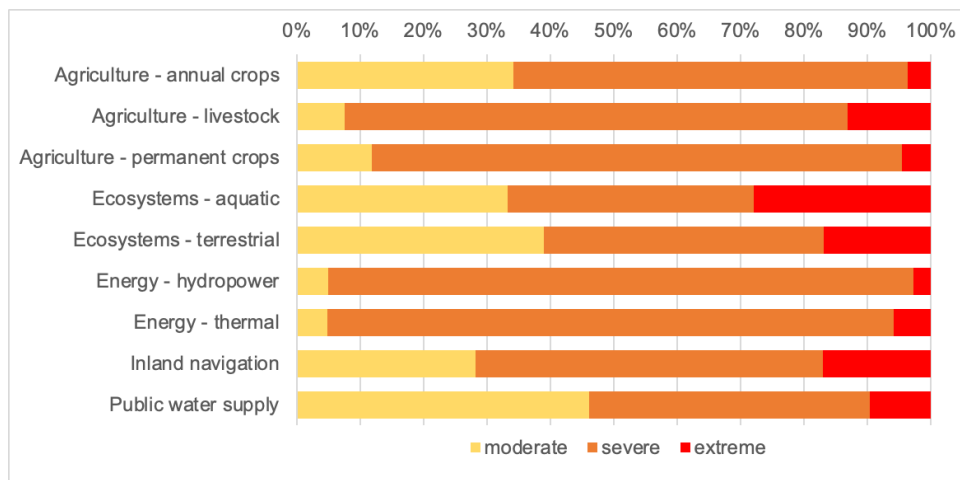

Figure S1: Relative distribution of severity scores by system in EDID

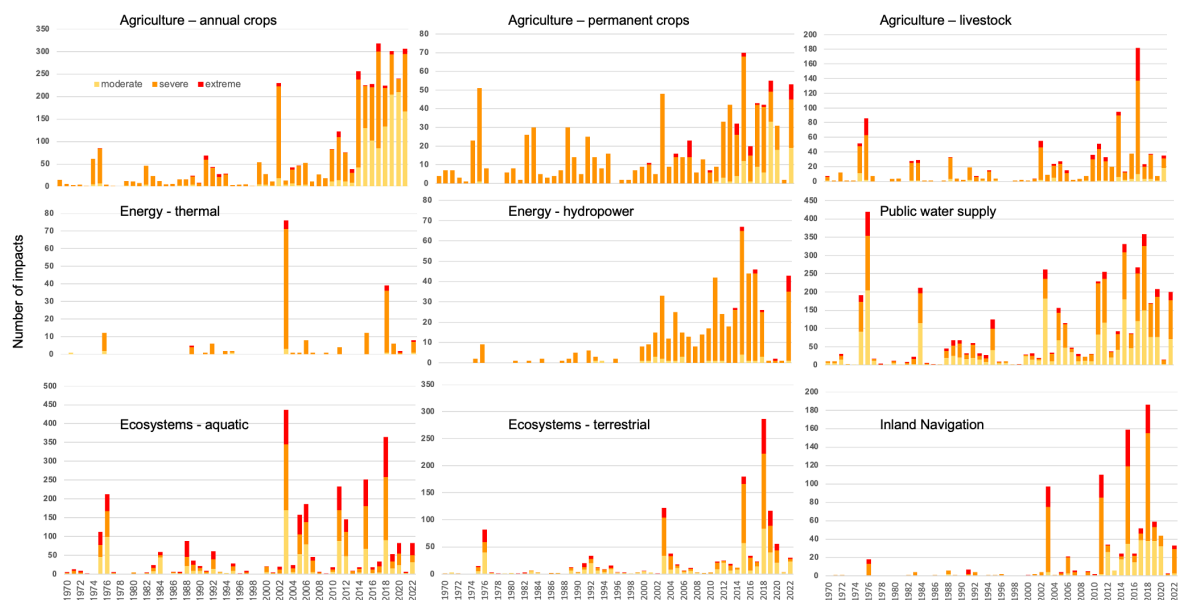

Figure S2: Impact severity over time by system

## S2. Additional maps: moderate and severe impacts (similar to Figure 5 in main text)

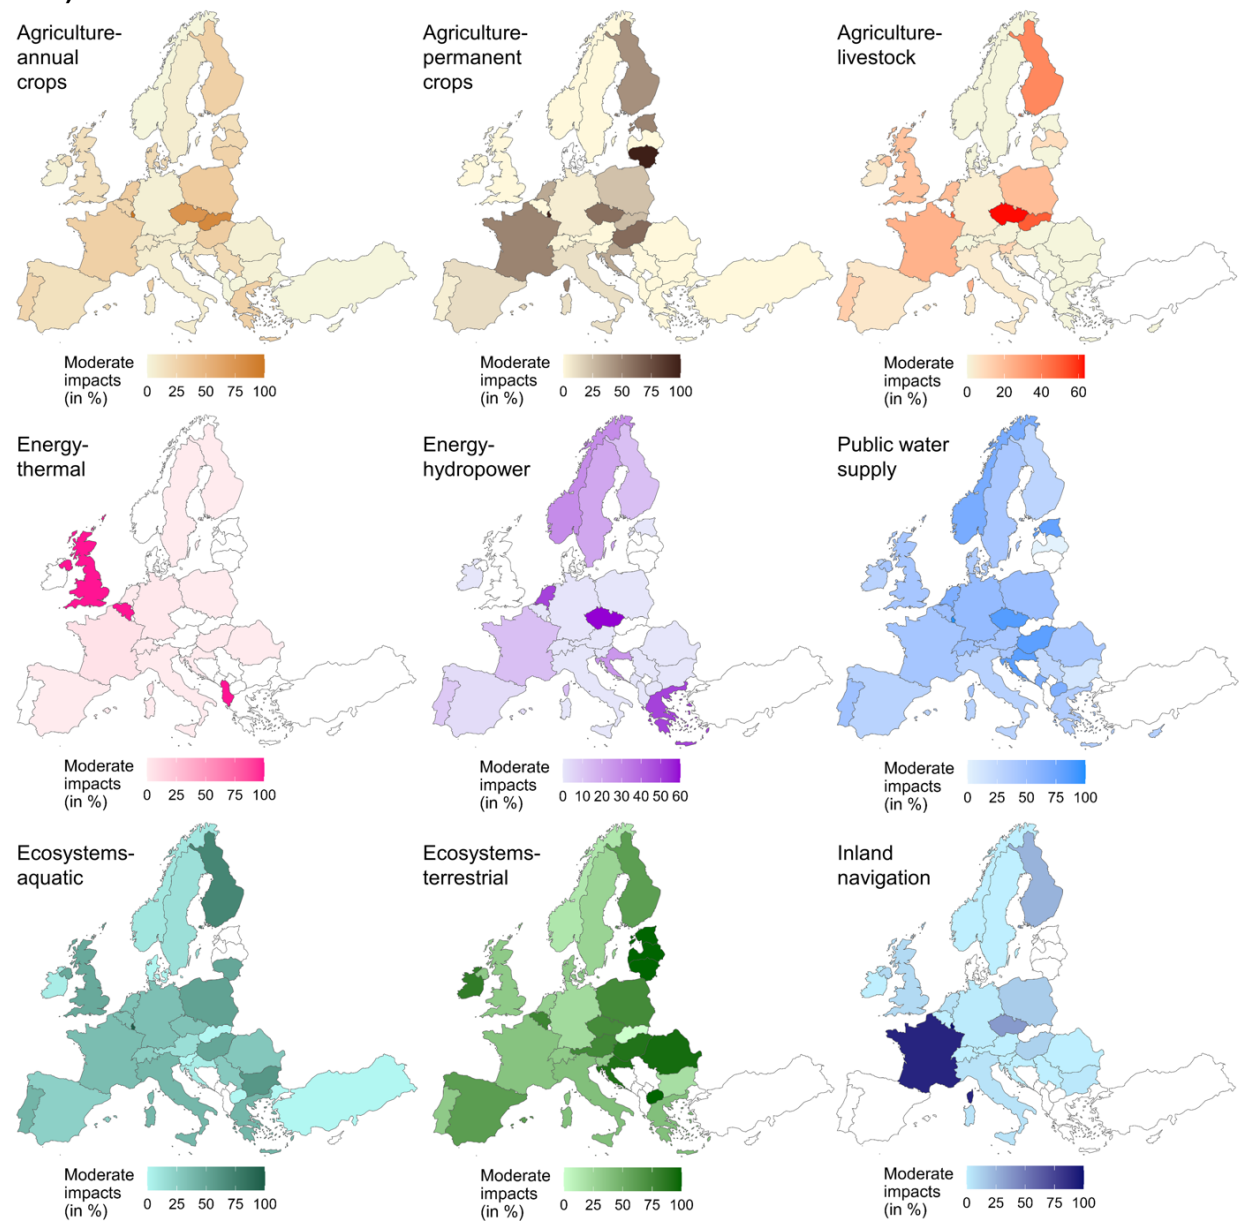

**Figure S3: Percentage of moderate impacts in each country and system; scaled to the total % of moderate impacts in the respective system.**

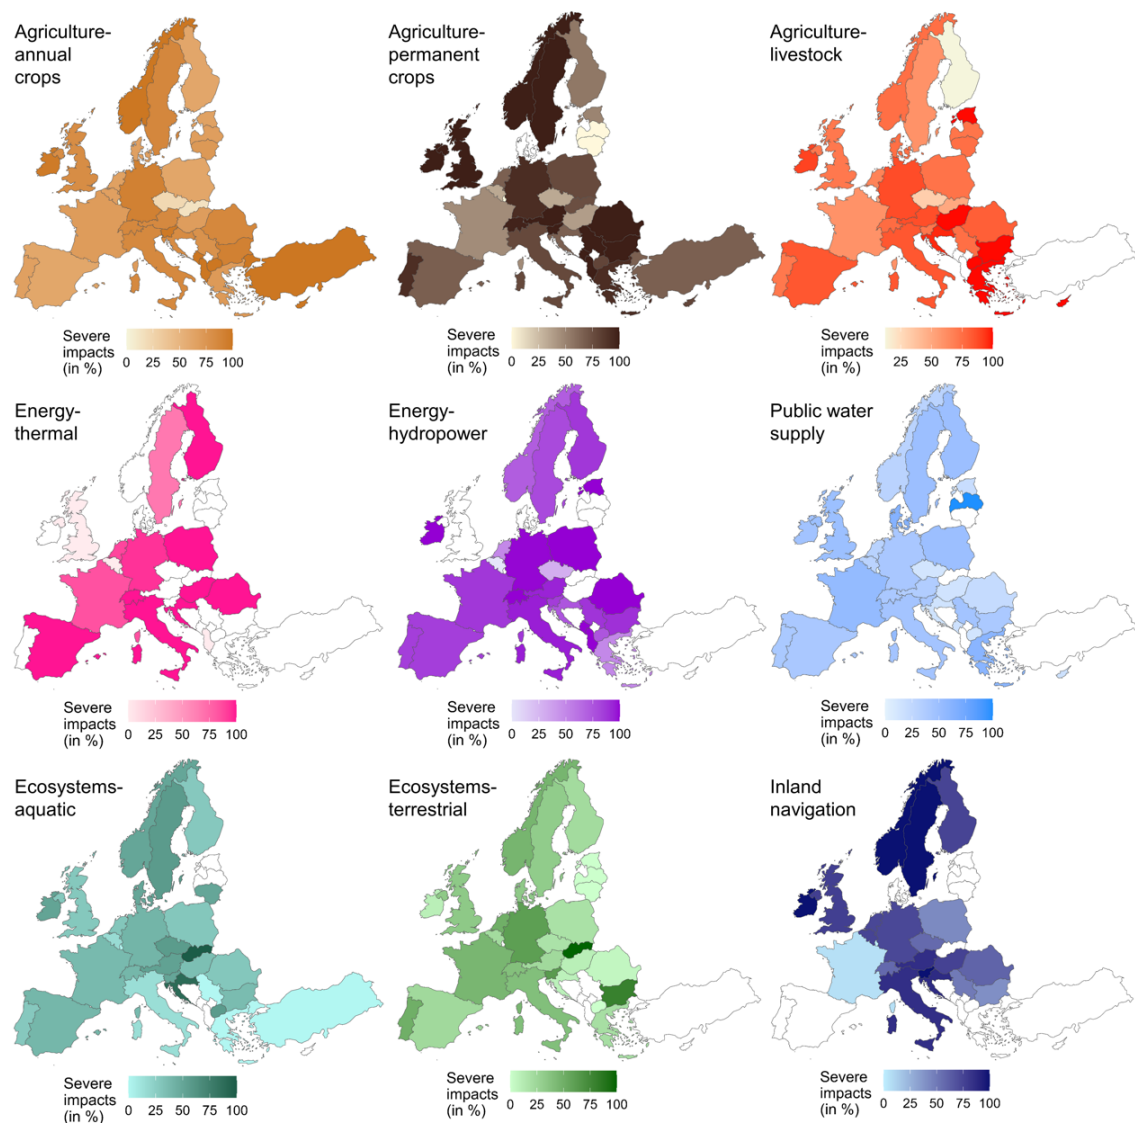

**Figure S4: Percentage of severe impacts in each country and system; scaled to the total % of severe impacts in the respective system.**
